# Supplementary material for: Functionalized Gelatin/Polysaccharide Hydrogels for Encapsulation of Hepatocytes
Source: MDPI journal article supplement (doi:10.3390/gels10040231), 2024-03-28
Supplement: s1 [file s1]

## Supplementary Materials

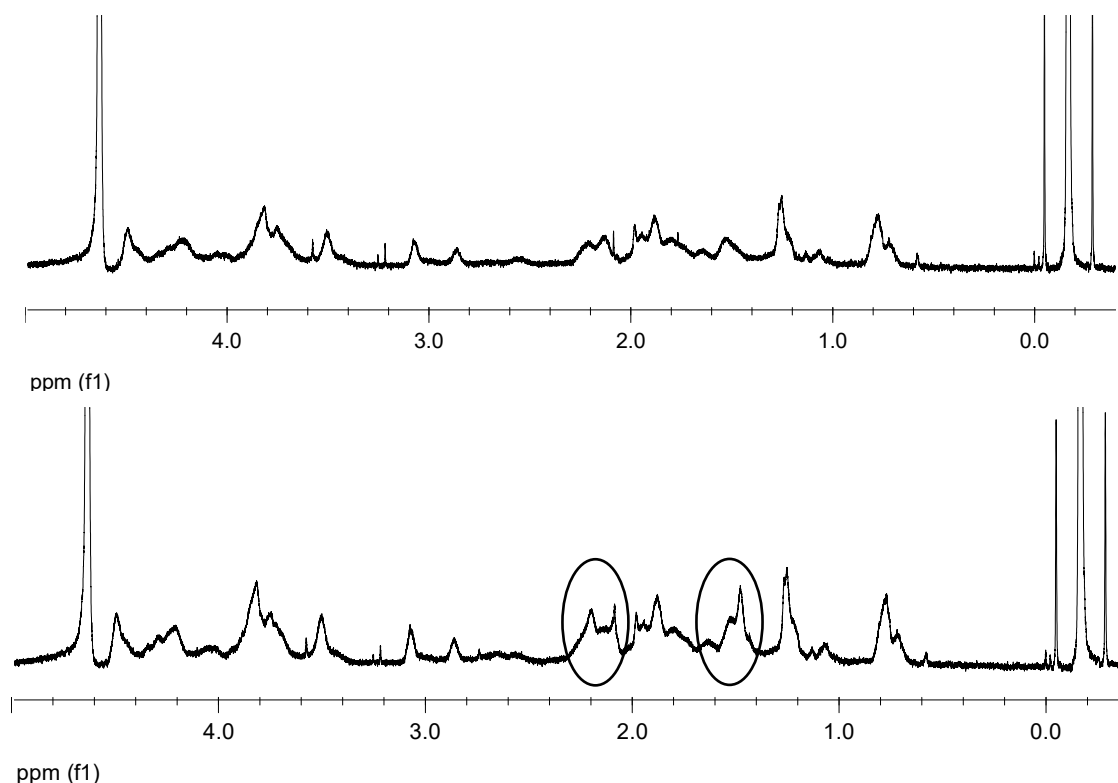

**Figure SI-1.**  $^1\text{H}$ -NMR spectrum of native gelatin (upper spectrum) and hydrazide functionalized gelatin (lower figure). Marked areas highlight signals appearing after the functionalization with hydrazide groups.

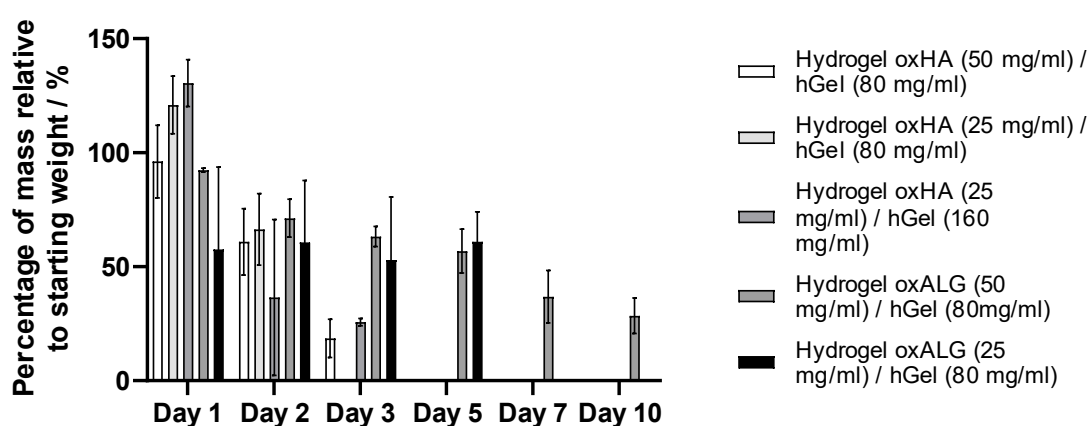

**Figure SI-2.** Degradation study of hydrogels composed of either oxHA or oxALG and hGel of different concentrations.  $n = 3$ .

(a)

|                                                                                    |                                                                                     |
|------------------------------------------------------------------------------------|-------------------------------------------------------------------------------------|
| Medium: EMEM                                                                       | Medium: EMEM + hGel (160 mg/mL)                                                     |
| 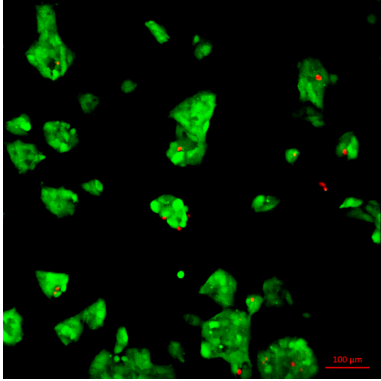  |   |
| Medium: EMEM + oxALG (50 mg/mL)                                                    | Medium: EMEM + oxHA (50 mg/mL)                                                      |
|  |  |

(b)

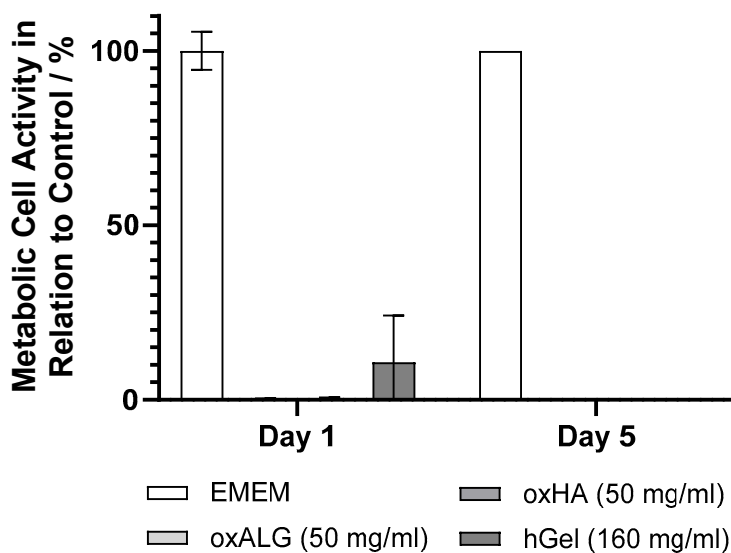

**Figure SI-3.** (a) Confocal microscopy pictures of HepG2 cells incubated in EMEM culture medium containing the individual components of the hydrogel. Photos were taken after 24 hours of incubation. (b) Q-Blue viability assay evaluation of HepG2 cells incubated in the individual hydrogel components with pure EMEM as control. Incubation time 1 and 5 days.
